# Supplementary material for: Effectiveness of Structured Nursing Interventions in Improving Pain Assessment and Management among hospitalized patients on the surgical ward at Byumba level two teaching hospital
Source: Research Square preprint supplement (doi:10.21203/rs.3.rs-7159445/v1), 2025-08-13
Supplement: Supplementary file 1 [file cde12e394bfc53e2622b889e.docx]

# Pain Management Improvement Checklist at Byumba Level Two Teaching Hospital

Date: ________ (Month, Day, Year)

## Section 1: Pain Assessment Practices

Pain assessed at admission: ☐ Yes ☐ No

Initial pain score (0–10): ☐ 0 ☐ 1 ☐ 2 ☐ 3 ☐ 4 ☐ 5 ☐ 6 ☐ 7 ☐ 8 ☐ 9 ☐ 10

Pain Assessment Items (Tick one):

Is patient educated to participate in pain management: ☐ Yes ☐ No ☐ Not documented

PQRST used to assess pain: ☐ Yes ☐ No ☐ Not documented

All elements of PQRST assessed: ☐ Yes ☐ No ☐ Not documented

Pain score recorded on file: ☐ Yes ☐ No ☐ Not documented

Pain intensity was rated using a standardized tool (e.g., Numeric Rating Scale): ☐ Yes ☐ No ☐ Not documented

Pain reassessed after analgesia administration: ☐ Yes ☐ No ☐ Not documented

Pain reassessment within 1 hour of intervention: ☐ Yes ☐ No ☐ Not documented

Pain control effectiveness was documented: ☐ Yes ☐ No ☐ Not documented

Pain score is documented in every nursing shift: ☐ Yes ☐ No ☐ Not documented

Changes in pain status were recorded: ☐ Yes ☐ No ☐ Not documented

Pain was regularly assessed by healthcare providers (see Multidisciplinary notes): ☐ Yes ☐ No ☐ Not documented

## Section 2: Pain Management

Appropriate pain killers provided (See Pain Management WHO Ladder): ☐ Yes ☐ No ☐ Not documented

Analgesia administered as prescribed: ☐ Yes ☐ No ☐ Not documented

Time of administration recorded: ☐ Yes ☐ No ☐ Not documented

Patient reported pain relief within 30–60 minutes: ☐ Yes ☐ No ☐ Not documented

Multimodal pain management used (e.g., non-pharmacological + meds): ☐ Yes ☐ No ☐ Not documented

Is non-pharmacological interventions used to manage pain?: ☐ Yes ☐ No ☐ Not documented

For Procedures performed (Wound Dressing, Traction, IV line insertion, NG tube, Lumbar puncture, etc): ☐ Yes ☐ No

Did the patient receive pain guidance before procedures (e.g., lumbar puncture, intubation)?: ☐ Yes ☐ No ☐ Not documented

Did the patient state that pain was alleviated by clinical staff using pharmacological and non-pharmacological means?: ☐ Yes ☐ No ☐ Not documented

Was psychological preparation and support provided when pain was anticipated?: ☐ Yes ☐ No ☐ Not documented

## Section 3: Patient Satisfaction (Ask Patient)

Patient verbalized understanding of pain management: ☐ Yes ☐ No

Staff returned to ensure that pain was alleviated following interventions: ☐ Yes ☐ No

Patient felt involved in decisions about pain management: ☐ Yes ☐ No

Patient received pain medication or treatments when needed: ☐ Yes ☐ No

Satisfied with explanation about pain management: ☐ Yes ☐ No

Satisfied with time taken to respond to pain complaints: ☐ Yes ☐ No

Satisfied with overall pain relief received: ☐ Yes ☐ No

## Section 4: Comments

What should improve in Pain Management? (Ask the patient: What could we do better to manage your pain?)

__________________________________________________________________

__________________________________________________________________

__________________________________________________________________
